# Supplementary material for: Single-cell alternative polyadenylation analysis delineates GABAergic neuron types
Source: PubMed Central journal article supplement (PMC8299648; doi:10.1186/s12915-021-01076-3), 2021-07-23
Supplement: 12915_2021_1076_MOESM1_ESM.pdf [file 12915_2021_1076_MOESM1_ESM.pdf]

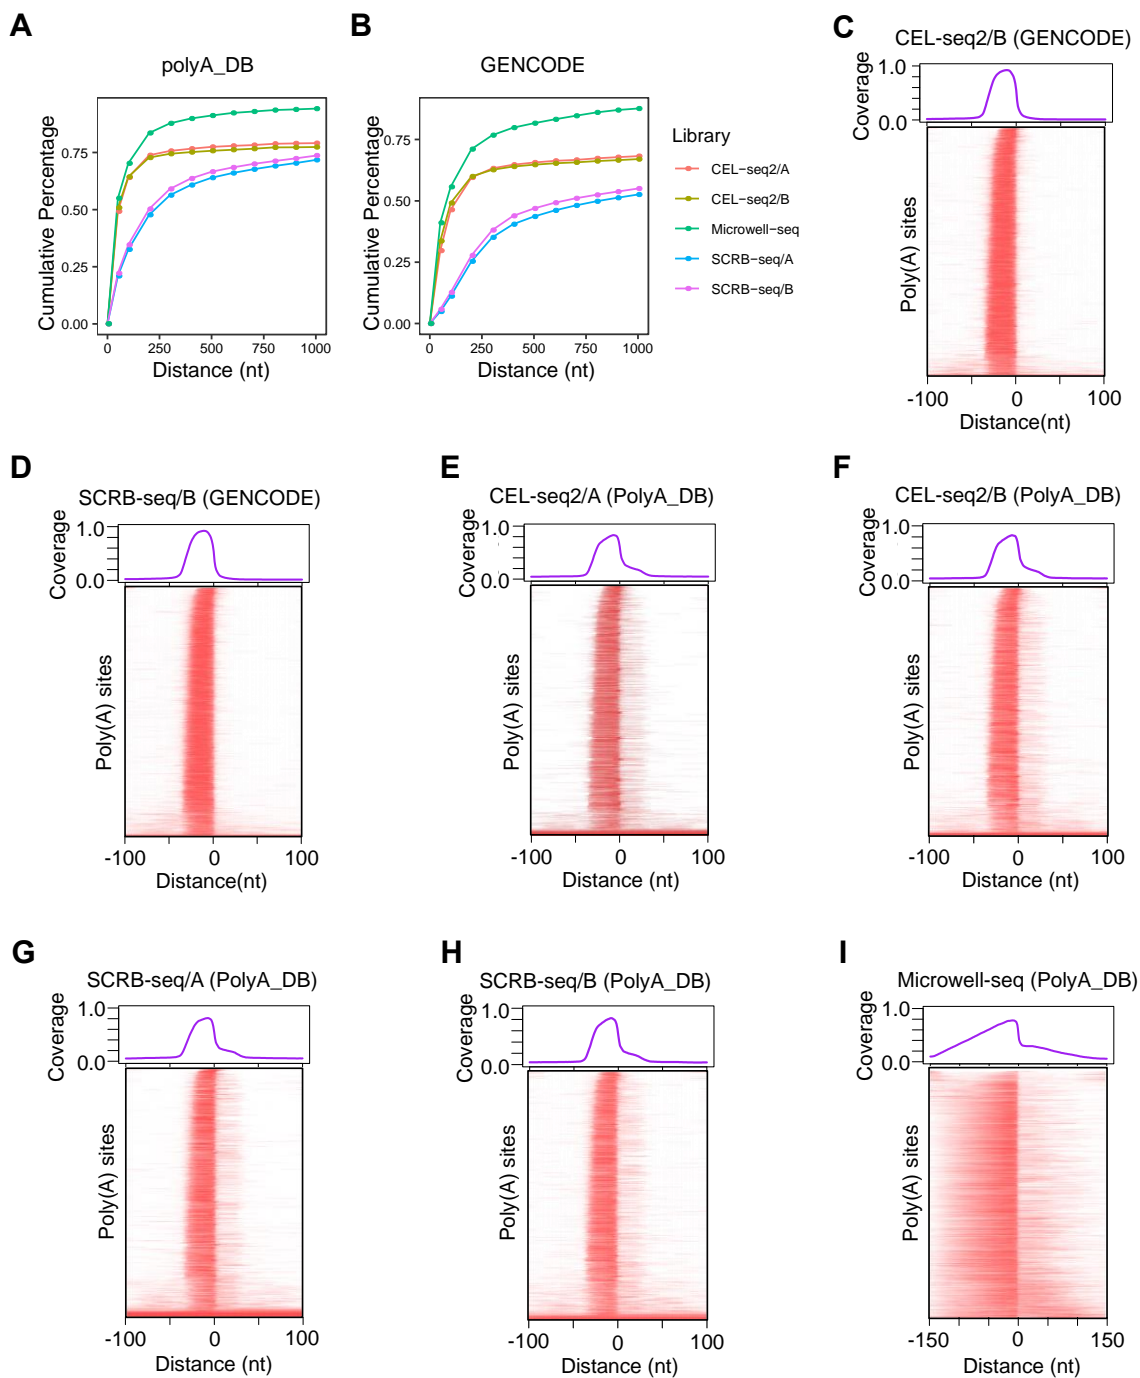

**Figure S1. The distributions of poly(A) reads around poly(A) sites annotated in GENCODE and PolyA\_DB\_3 in 3'-tag based scRNA-seq data.**

**(A-B)** The cumulative distributions of distances between 3' end of poly(A) reads and their closest annotated in PolyA\_DB\_3 **(A)** and GENCODE **(B)**. Y-axis represents cumulative percentage and

X-axis represents distance. Five 3'-tag based scRNA-seq datasets are used, including CEL-seq2/A, CEL-seq2/B, SCR-seq/A, SCR-seq/B and Microwell-seq.

**(C-D)** The plots as supplements to Fig. 1B show read coverage of poly(A) reads around poly(A) sites annotated in GENCODE in CEL-seq2/B **(C)** and SCR-seq/B **(D)** dataset. The upper panels depict average read coverage of poly(A) reads around poly(A) sites. Y-axis represents the average read coverage and X-axis represents the distance from upstream 100 nt to downstream 100 nt to annotated poly(A) sites. The lower panels depict the read coverage for each poly(A) site using heatmaps.

**(E-I)** Read coverage of poly(A) reads around poly(A) sites annotated in PolyA\_DB 3 in all five 3'-tag based scRNA-seq datasets are shown, including CEL-seq2/A **(E)**, CEL-seq2/B **(F)**, SCR-seq/A **(G)**, SCR-seq/B **(H)** and Microwell-seq **(I)** .

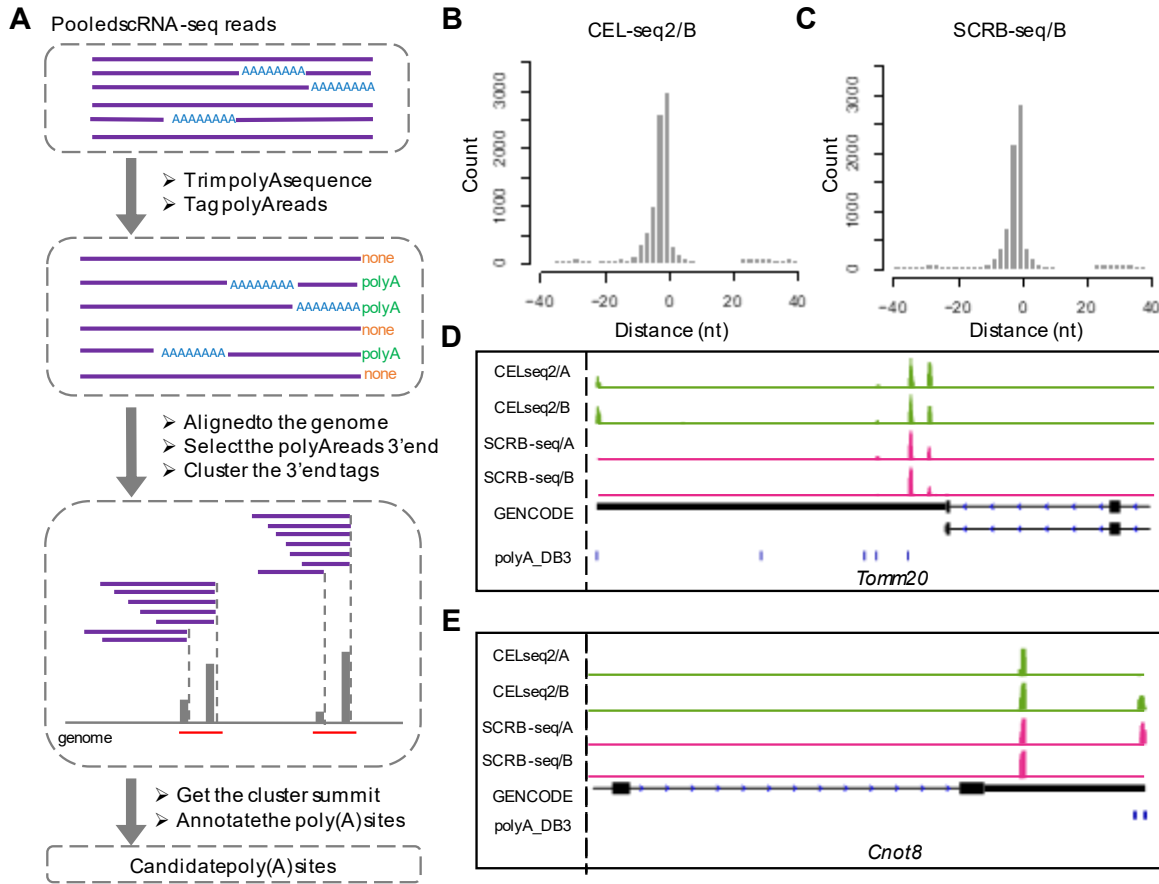

**Figure S2. Identification of poly(A) sites using 3'-tag based scRNA-seq data.**

**(A)** Schematic overview of SAPAS to identify poly(A) sites using 3'-tag based scRNA-seq data.

**(B-C)** The histograms as supplements to Fig. 1C-E depict comparisons between identified poly(A) sites and annotated poly(A) sites. The Y-axis represents the count of poly(A) sites and the X-axis represent the distance between identified poly(A) sites and the closest annotated poly(A) sites,

**(B)** is for CEL-seq2/B dataset, **(C)** is for SCR-seq/B dataset.

**(D-E)** The IGV plots depict examples of novel poly(A) sites identified in mESCs. Poly(A) reads coverages are displayed for *Tomm20* **(D)** and *Cnot8* **(E)**. Each row represents a 3'-tag based scRNA-seq dataset of mESCs.

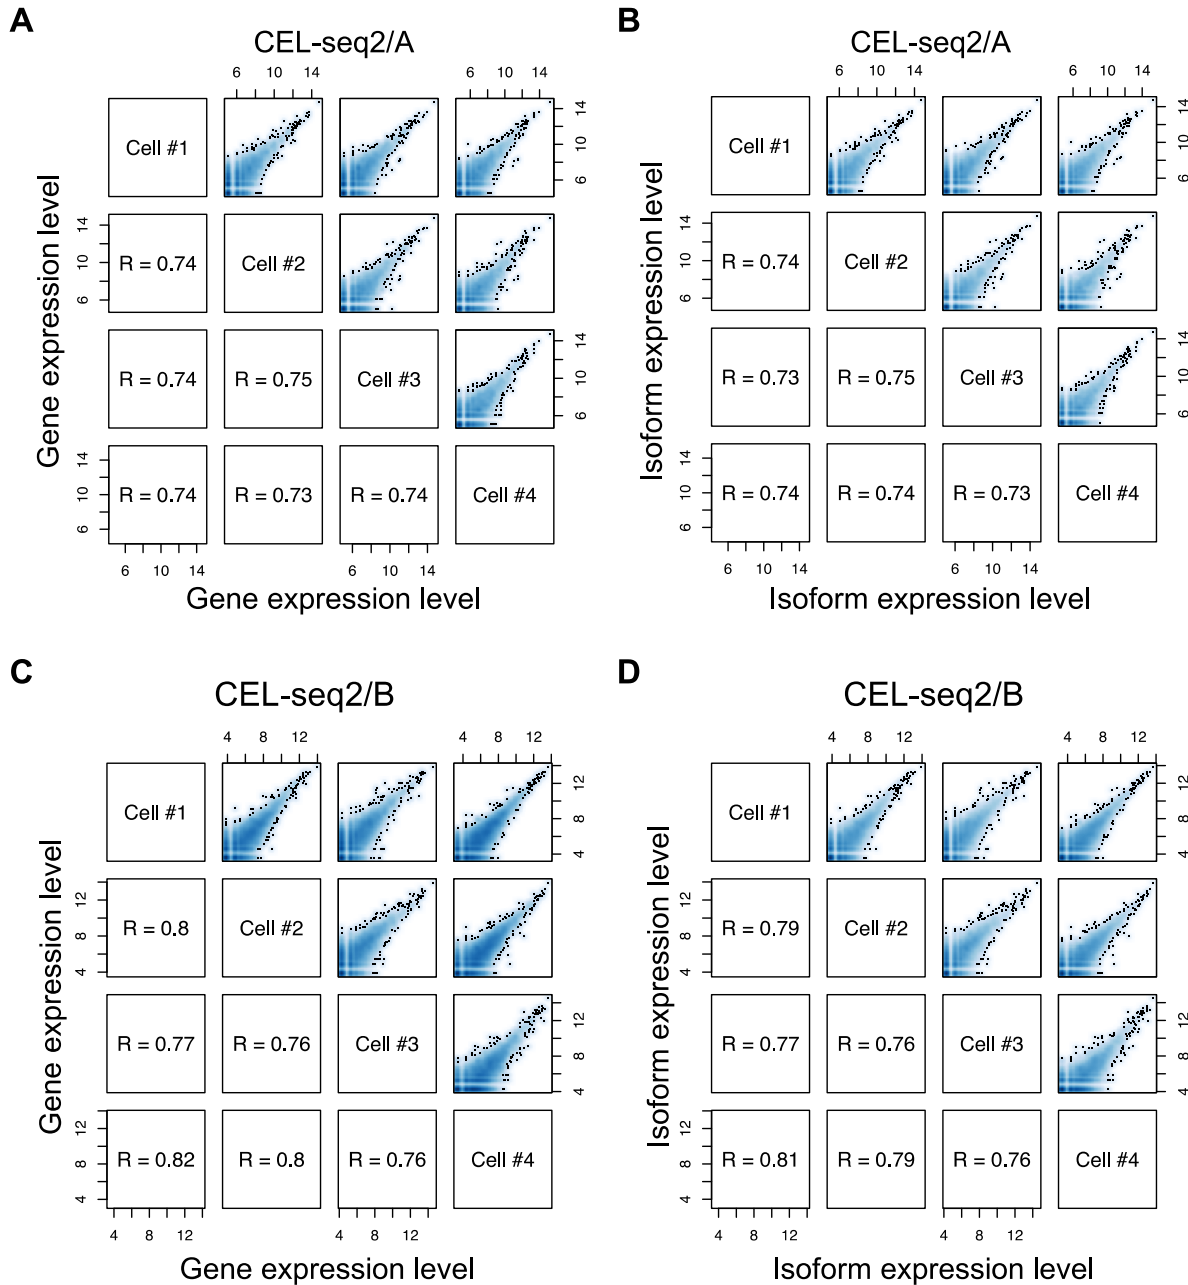

**Figure S3. Pairwise comparisons of gene expression level and poly(A) isoform expression level for CEL-seq2.**

The smooth scatterplots pairwise comparing gene expression level (**A**, **C**) and poly(A) isoform expression level (**B**, **D**) of 4 randomly selected single cells from CEL-seq2/A (**A**, **B**) and CEL-seq2/B (**C**, **D**) datasets. The lower left indicates the Pearson correlation coefficients (R) for each comparison.



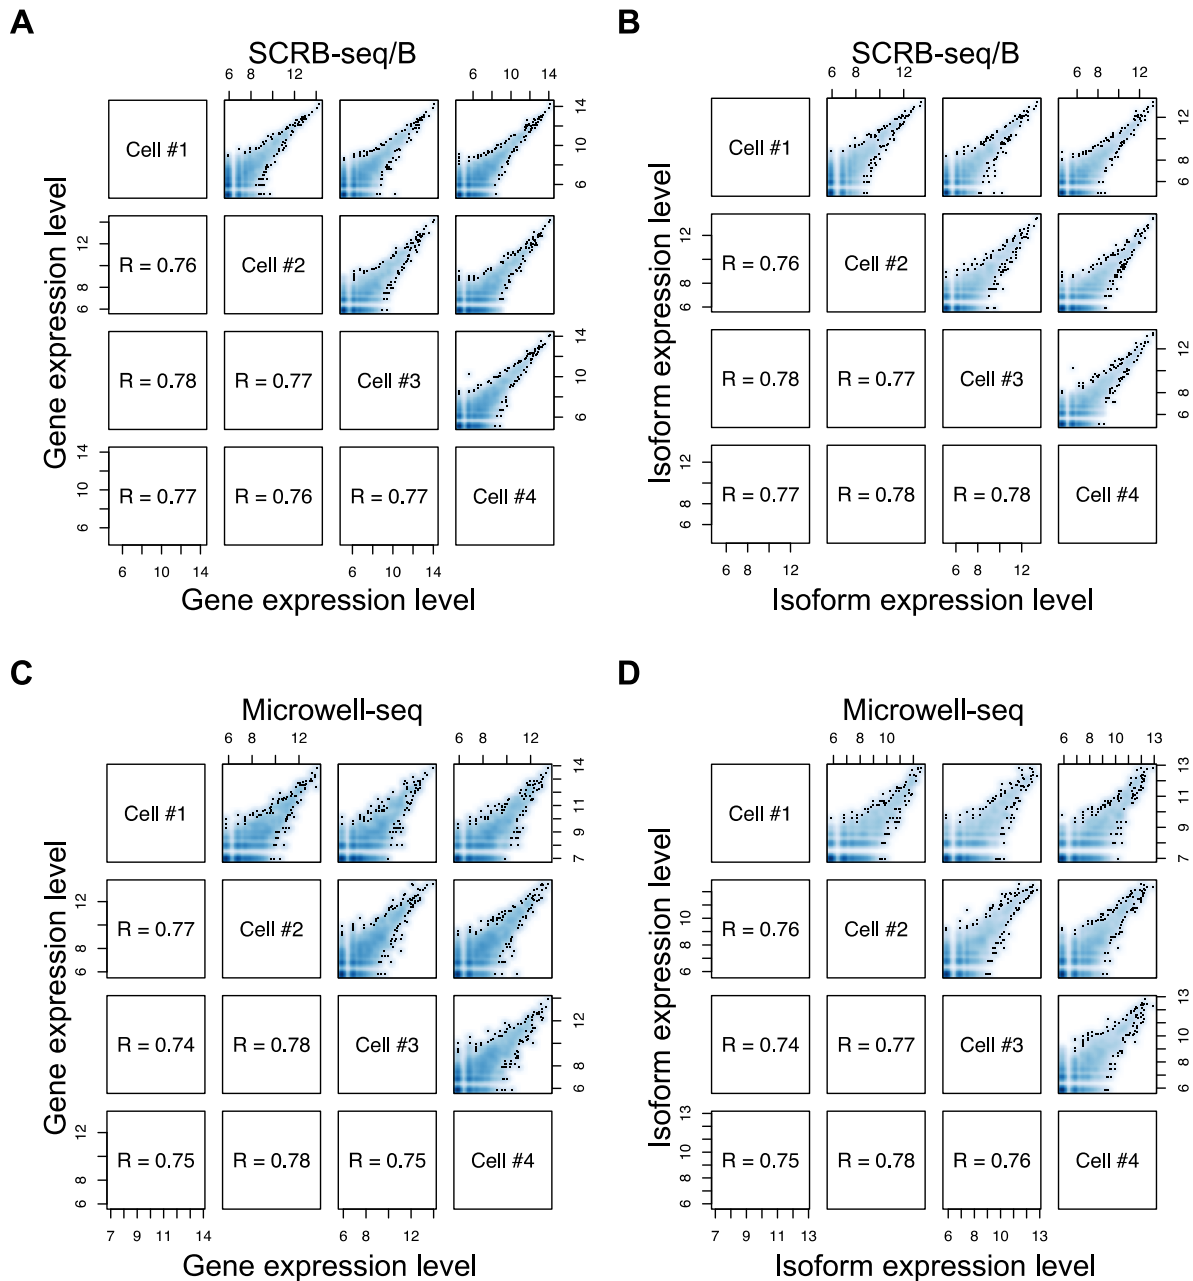

**Figure S4. Pairwise comparisons of gene expression level and poly(A) isoform expression level for SCRIB-seq and Microwell-seq.**

The smooth scatterplots pairwise comparing gene expression level (**A**, **C**) and poly(A) isoform expression level (**B**, **D**) of 4 randomly selected single cells from SCRIB-seq/B (**A**, **B**) and Microwell-seq (**C**, **D**) datasets. The lower left indicates the Pearson correlation coefficients ( $R$ ) for each comparison.

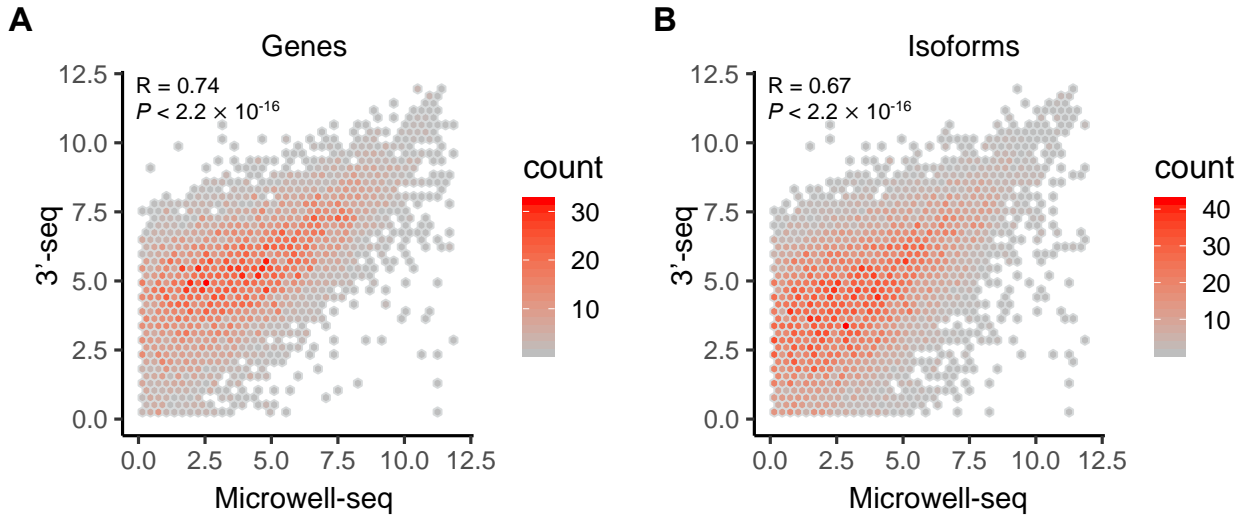

**Figure S5. Comparisons of gene expression level and poly(A) isoform expression level estimated from Microwell-seq and 3'-seq data.**

The hexbin scatterplots depict comparisons of gene expression level (**A**) and poly(A) isoform expression level (**B**) estimated from Microwell-seq and bulk 3'-seq. Y-axis represents bulk 3'-seq and X-axis represents Microwell-seq. The dashed lines represent the reference diagonal and the hexbins are colored by number of data points.

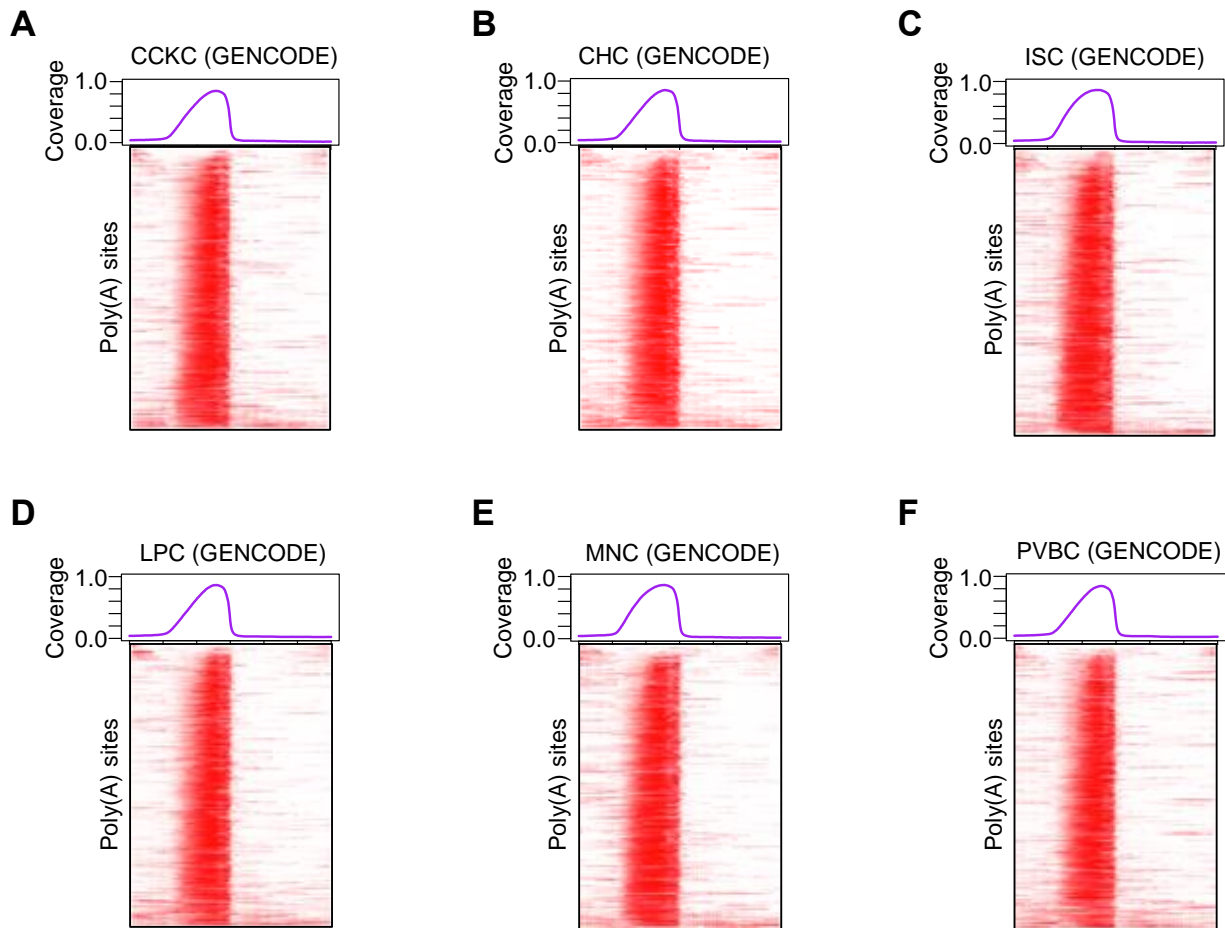

**Figure S6. The distributions of poly(A) reads around poly(A) sites annotated in GENCODE in scRNA-seq data of GABAergic neurons.**

Read coverage of poly(A) reads around poly(A) sites annotated in GENCODE in the scRNA-seq dataset of six different GABAergic neuron types are shown, including CCKC (**A**), CHC (**B**), ISC (**C**), LPC (**D**), MNC (**E**), PVBC (**F**). The upper panels depict average read coverage of poly(A) reads around poly(A) sites. Y-axis represents the average read coverage and X-axis represents the distance from upstream 100 nt to downstream 100 nt to annotated poly(A) sites. The lower panels showing the read coverage for each poly(A) site using heatmaps.

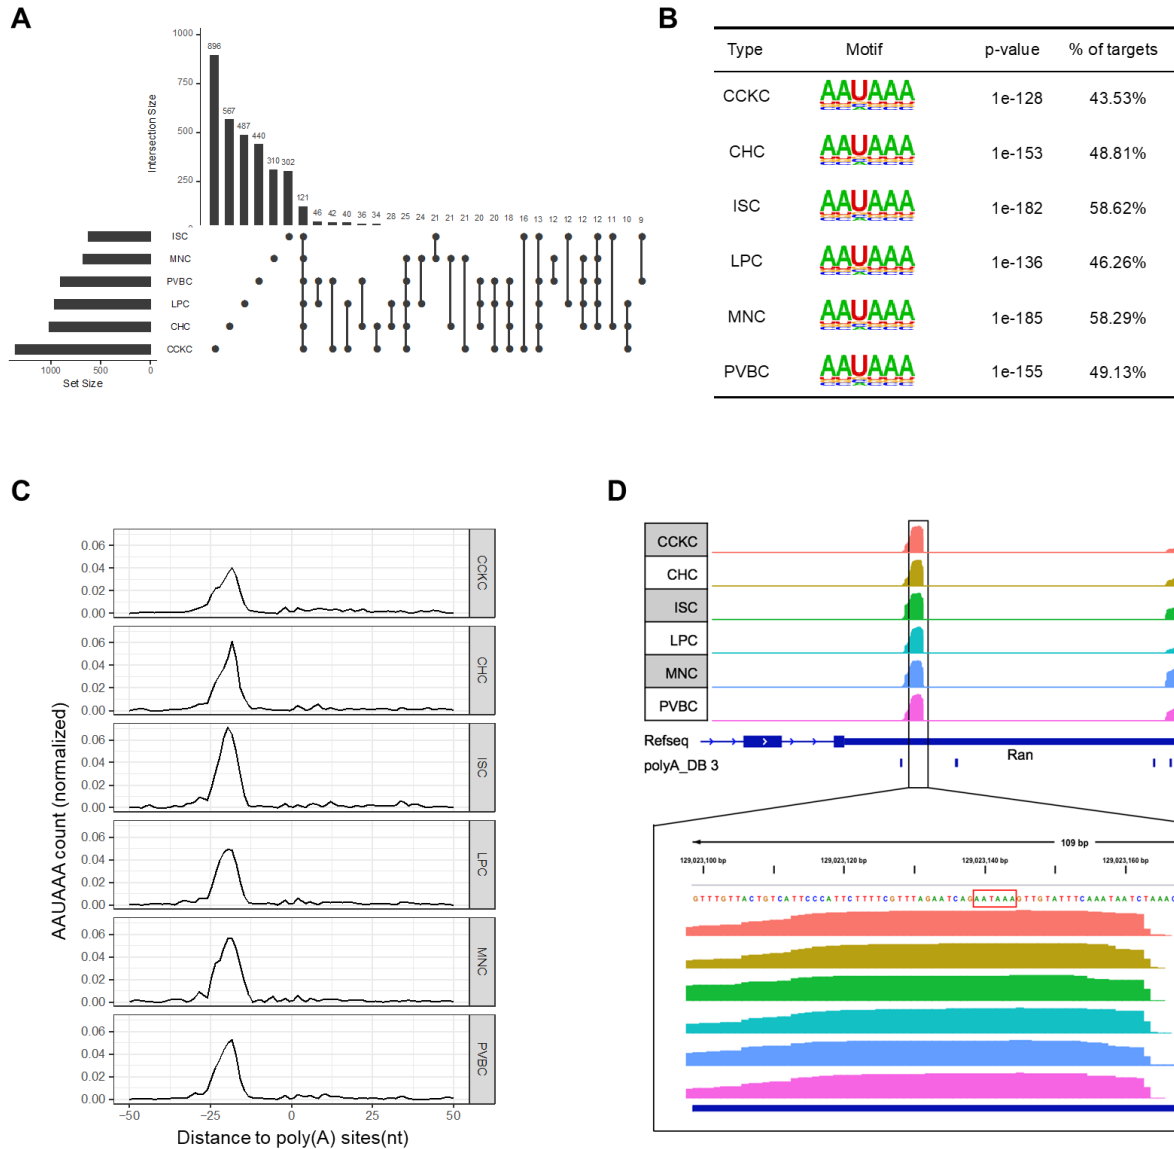

**Figure S7. Novel poly(A) sites in GABAergic neurons.**

**(A)** The Upset plot depicts the intersections of novel poly(A) sites identified in scRNA-seq data of different GABAergic neuron types (CCKC, CHC, ISC, LPC, MNC, PVBC).

**(B)** Canonical poly(A) signal (AAUAAA) enrichments for novel poly(A) sites identified in different GABAergic neuron types. *P*-values and percentages of targets are shown.

**(C)** The line plots illustrate the canonical poly(A) signal (AAUAAA) distribution from upstream 50 nt to downstream 50 nt to novel poly(A) sites. The Y-axis represents the frequency of the

canonical poly(A) signal (AAUAAA) and the X-axis represents the distance from upstream 50 nt to downstream 50 nt to novel poly(A) sites.

**(D)** A novel poly(A) identified in the 3' UTR of *Ran* in all six different GABAergic neuron types. The upper panel depicts read coverage of poly(A) reads along the 3' UTR of *Ran* and each row represents a specific GABAergic neuron type. Two annotation tracks are shown, including gene annotation model from Refseq and poly(A) site annotations from PolyA\_DB 3. The lower panel shows that the novel poly(A) site harbors the canonical AAUAAA motif at ~20 nt upstream.

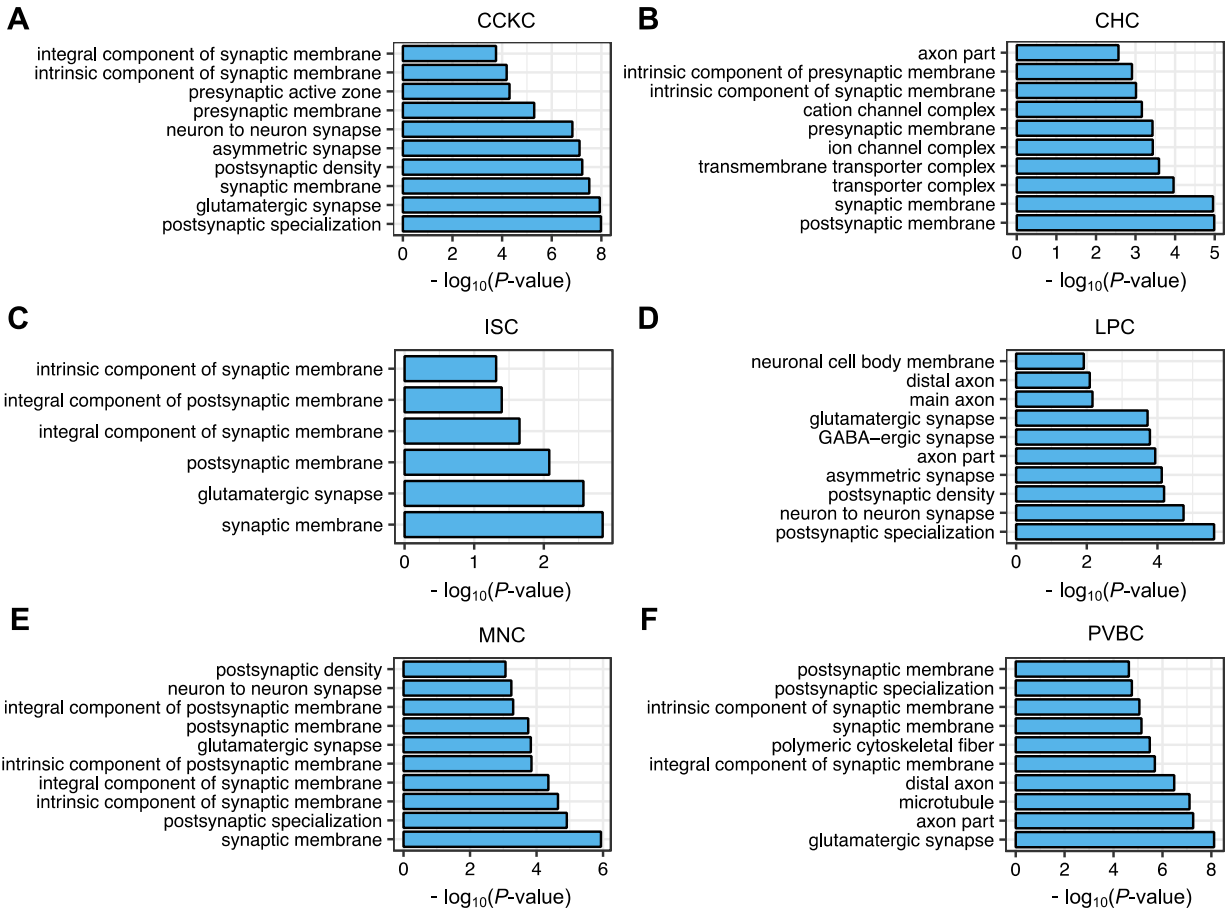

**Figure S8. GO enrichment for genes with novel poly(A) sites.**

The bar plots depict GO term (cellular component) enrichments for genes with novel poly(A) sites identified in 6 different GABAergic neuron types, including CCKC (A), CHC (B), ISC (C), LPC (D), MNC (E), PVBC (F). Y-axis represent GO term (cellular component) and X-axis represent the significance of GO term enrichment in  $-\log_{10}(P\text{-value})$ .

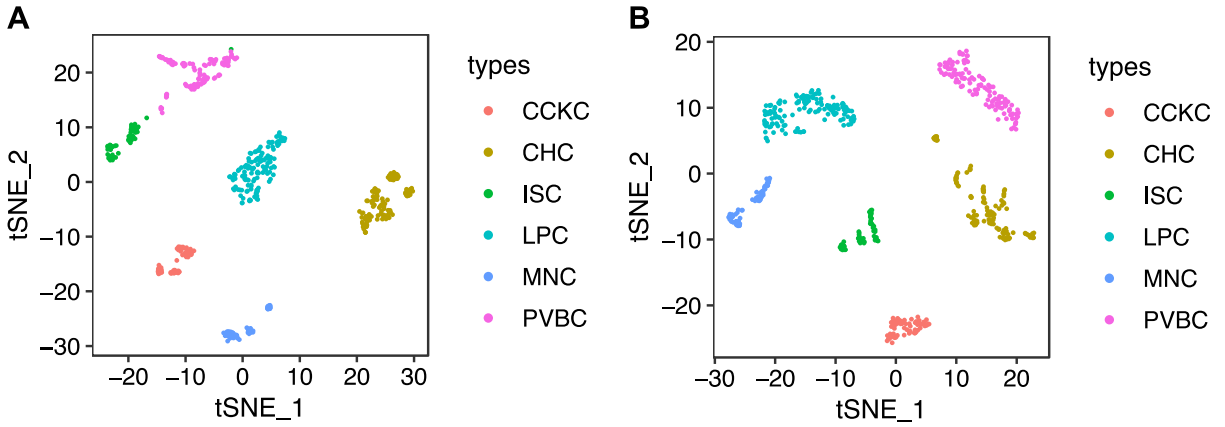

**Figure S9. Clustering of GABAergic neurons.**

As supplements to Fig. 3C, t-SNE plots of 6 different GABAergic neuron types on poly(A) isoform expression level **(A)** and poly(A) site usage **(B)**. The neuron types are labeled using different colors as indicated.





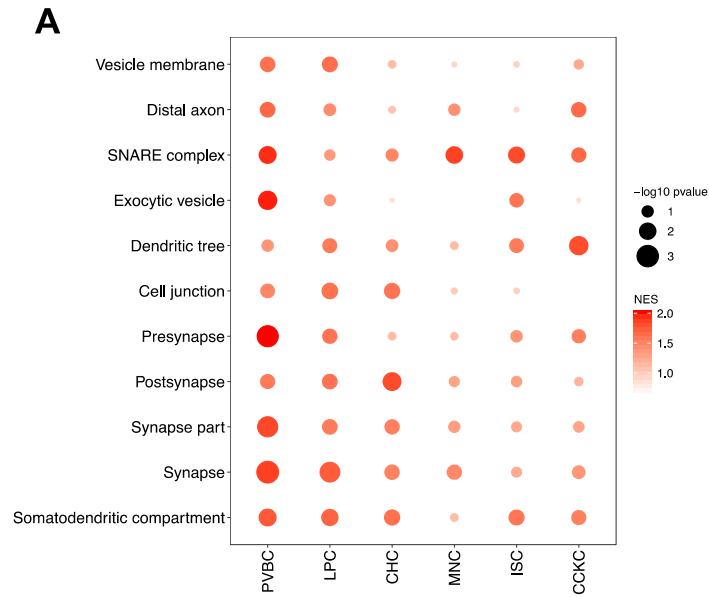

**Figure S11. GO terms enriched in genes with cell-type specific APA events for each GABAergic neuron type.**

As supplement to Fig. 3E, Synaptic communications related GO terms (cellular component) enriched in genes with cell-type specific APA events for each GABAergic neuron type. The normalized enrichment scores (NES) calculated by GSEA are indicated by gradient red and the p-values are indicated by circle size.

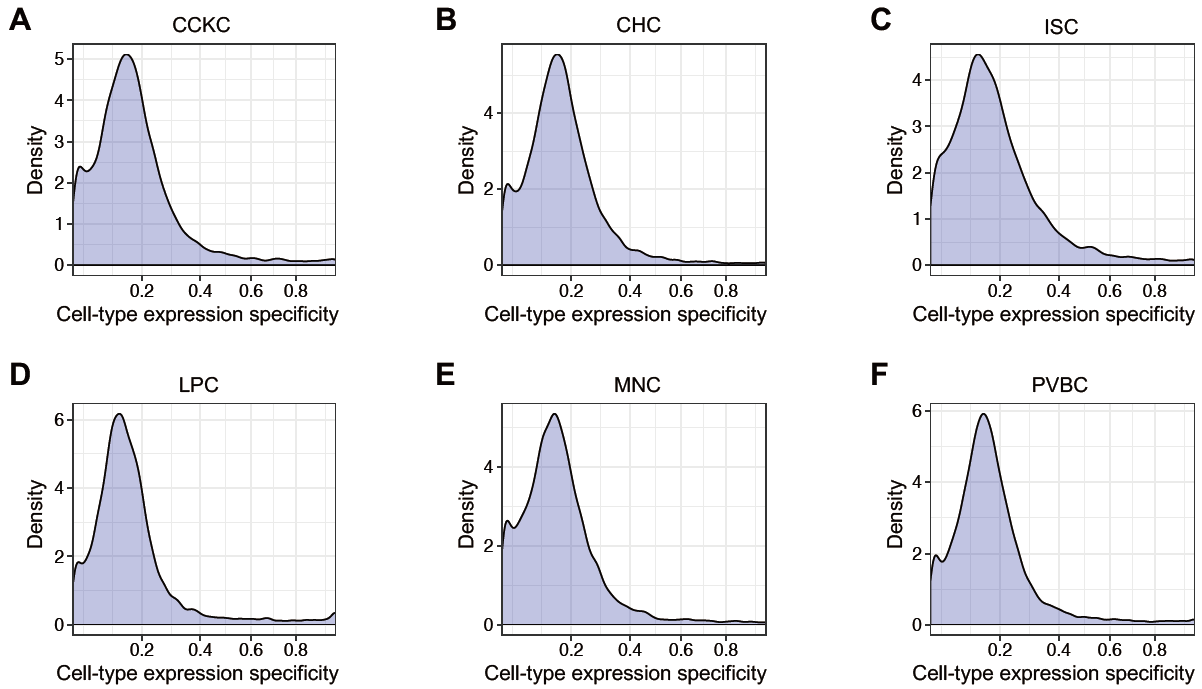

**Figure S12. Cell-type expression specificity for each gene in different GABAergic neuron types.**

The density plots depict cell-type expression specificity for each gene in different GABAergic neuron types, including CCKC (**A**), CHC (**B**), ISC (**C**), LPC (**D**), MNC (**E**), PVBC (**F**).

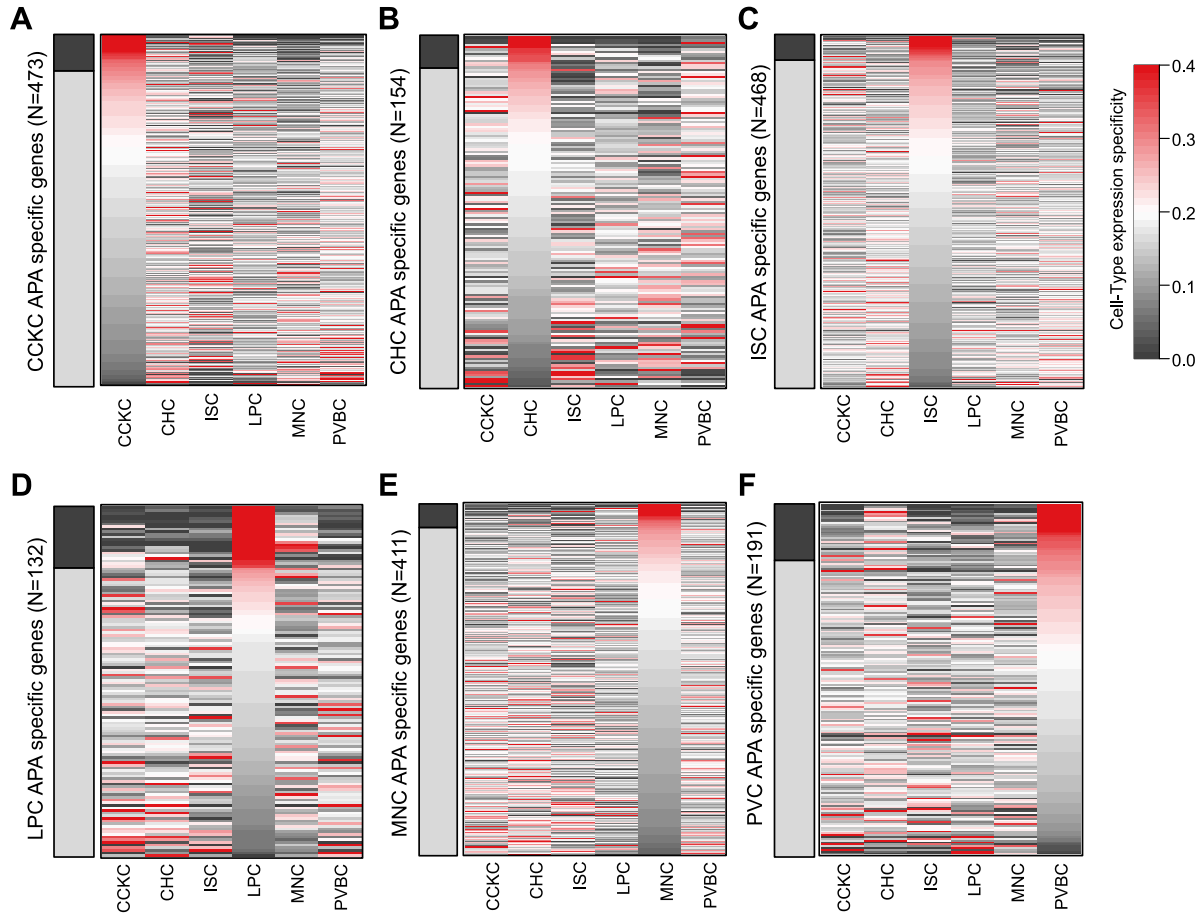

**Figure S13. Cell-type expression specificity for genes with cell-type specific APA events.**

The heatmaps depict cell-type expression specificity for genes with cell-type specific APA events for each GABAergic neuron type. The cell-type expression specificity calculated by EWCE are shown in gradient grey to red. The left stacked bars show percentages of genes with cell-type expression specificity larger than 0.3 in black.

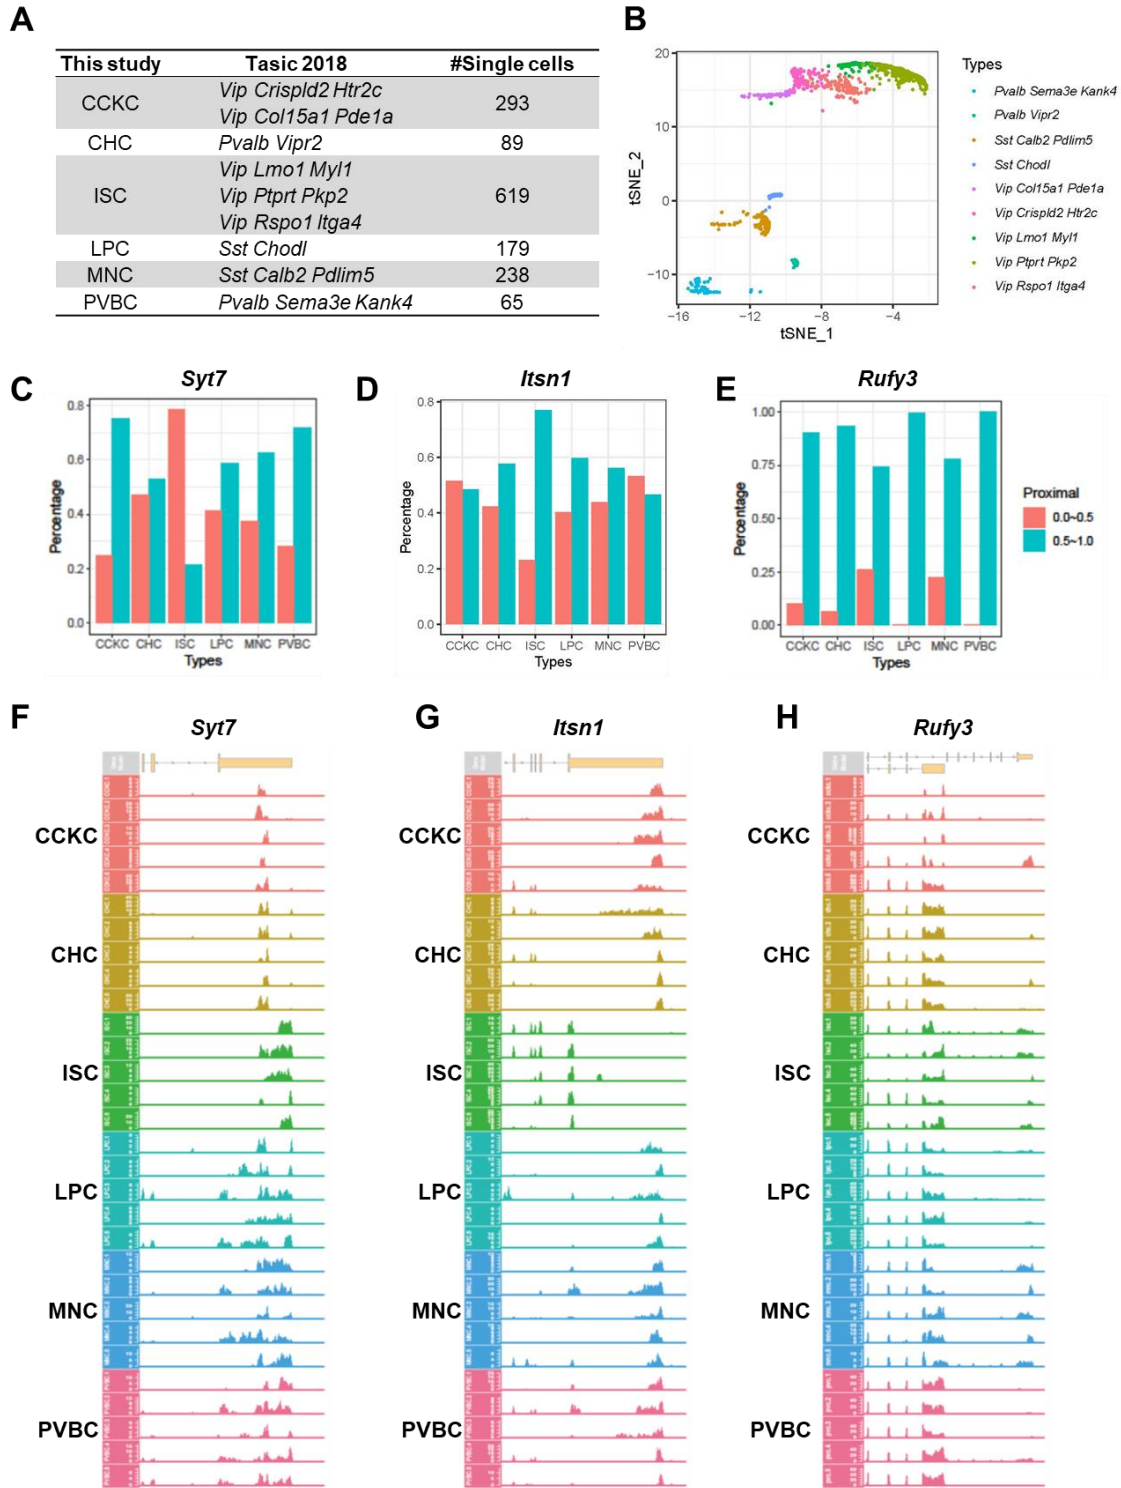

**Figure S14. Validation of the cell-type specific APA events using a Smart-seq2 dataset from Tasic et al. study.**

**(A)** Correspondence of neuron types in our study to Tasic et al. study. The number of single cells of each neuron type was shown.

**(B)** The t-SNE plot of all corresponded single cells based on the coordinated provided in Tasic et al. study. Different cell types are labeled using different colors as shown.

**(C-E)** The bar charts show the proportions of single cells with proximal poly(A) site usage at the range of 0~0.5 and 0.5~1 for the cell-type specific APA genes in Fig. 3, including *Syt7* **(C)**, *Itsn1*

**(D)** and *Rufy3* **(E)**.

**(F-H)** The scRNA-seq read coverage of each cell-type specific APA gene from Smart-seq2 data of Tasic et al. study is displayed. Each track represents a single cell randomly selected for corresponded cell types. Different cell types are shown using different colors.

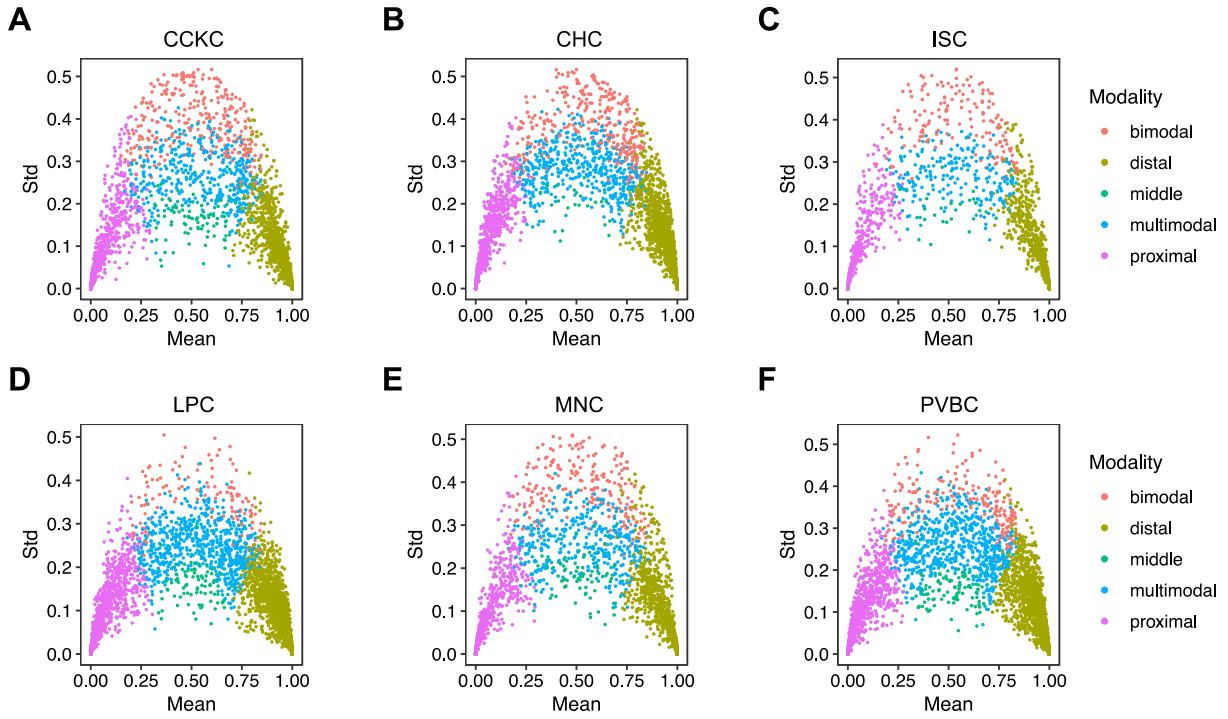

**Figure S15. Mean-variance relations of distal poly(A) site usage in different GABAergic neuron types.**

The scatter plots depict the standard deviation of distal poly(A) site usage across single cells as a function of the average of distal poly(A) site usage. 6 different GABAergic neuron types are shown, including CCKC (**A**), CHC (**B**), ISC (**C**), LPC (**D**), MNC (**E**), PVBC (**F**). The estimated modalities are labeled by different colors as indicated. Y-axis represents the standard deviation and X-axis represents mean.

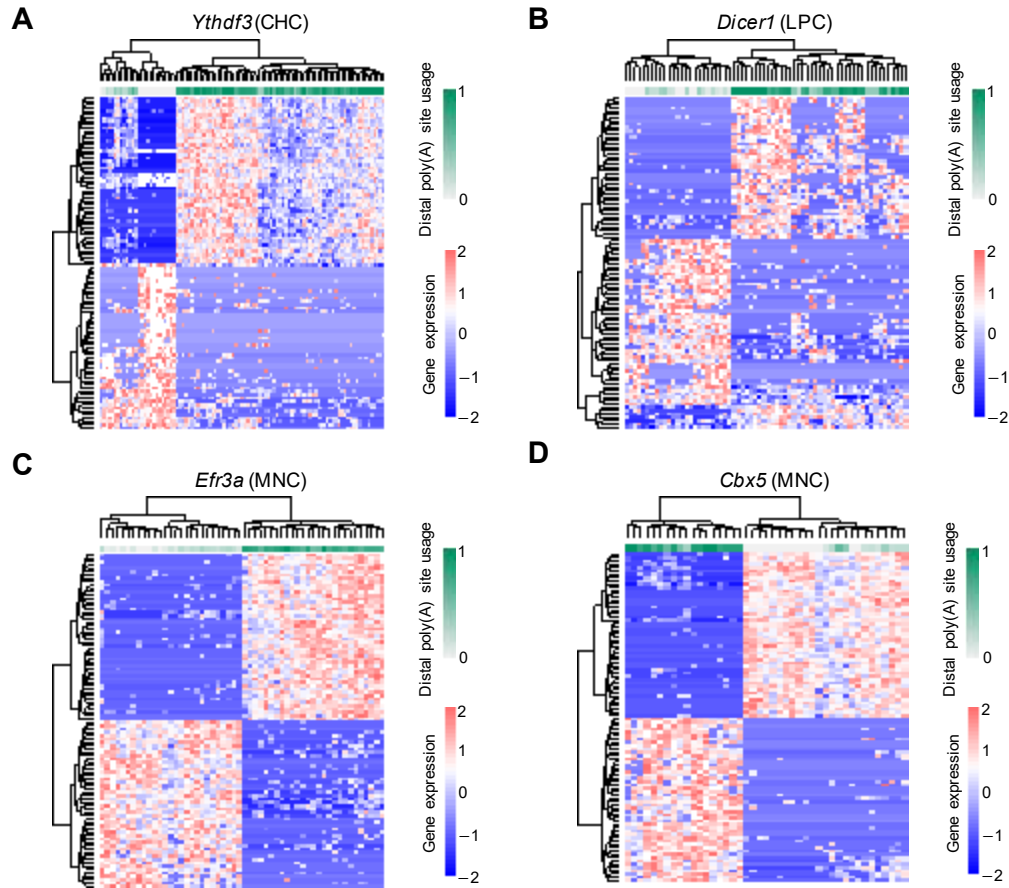

**Figure S16. Examples with the potential to demarcate subpopulations of GABAergic neurons.**

The heatmap depicts that those genes top correlated with distal poly(A) site usage could cluster specific GABAergic neuron type into subpopulations. **(A)** is for *Ythdf3* in CHC. **(B)** is for *Dicer1* in LPC. **(C)** is for *Efr3a* in MNC. **(D)** is for *Cbx5* in MNC. Columns represent single cells and rows represent correlated genes. The blue to red gradient represents gene expression level in  $\log_2(\text{uTPM} + 1)$ . The green gradient represents distal poly(A) site usage of the gene.
